# Supplementary material for: Cost-effectiveness of introducing national seasonal influenza vaccination for adults aged 60 years and above in mainland China: a modelling analysis
Source: PubMed Central journal article supplement (PMC7155276; doi:10.1186/s12916-020-01545-6), 2020-04-14
Supplement: 12916_2020_1545_MOESM3_ESM.pdf [file 12916_2020_1545_MOESM3_ESM.pdf]

### Additional file 3. Population size

Table S1. Age-specific population size in 2016 and proportion of urban residents in the elderly aged 60 years and over, China

| Region                       | Number of elderly population in 2016 |            |            |           |           |            | Number of elderly population in 2010 Census <sup>24</sup> |            |                                             |
|------------------------------|--------------------------------------|------------|------------|-----------|-----------|------------|-----------------------------------------------------------|------------|---------------------------------------------|
|                              | 60-                                  | 65-        | 70-        | 75-       | ≥80       | Total      | Urban areas*                                              | Total      | Proportion of population in urban areas (%) |
| <b>Northern<sup>†</sup></b>  | 8,709,204                            | 5,501,341  | 4,469,037  | 3,586,402 | 2,980,987 | 25,246,971 | /                                                         | /          | /                                           |
| Beijing                      | 887,061                              | 618,763    | 631,518    | 547,562   | 432,622   | 3,117,526  | 2,056,206                                                 | 2,460,108  | 83.6                                        |
| Tianjin                      | 799,155                              | 504,610    | 387,915    | 332,246   | 310,829   | 2,334,755  | 1,303,592                                                 | 1,684,685  | 77.4                                        |
| Subtotal <sup>‡</sup>        | 1,686,216                            | 1,123,373  | 1,019,433  | 879,808   | 743,451   | 5,452,281  | 3,359,798                                                 | 4,144,793  | 81.1                                        |
| <b>Northeast<sup>†</sup></b> | 6,291,490                            | 4,086,626  | 3,412,485  | 2,434,404 | 2,120,108 | 18,345,113 | 8,995,198                                                 | 15,369,915 | 58.5                                        |
| Liaoning                     | 2,546,440                            | 1,793,694  | 1,454,519  | 1,103,511 | 1,028,502 | 7,926,666  | 4,066,177                                                 | 6,750,752  | 60.2                                        |
| Jilin                        | 1,600,564                            | 976,675    | 802,018    | 550,725   | 474,940   | 4,404,922  | 1,988,854                                                 | 3,626,548  | 54.8                                        |
| Heilongjiang                 | 2,144,486                            | 1,316,257  | 1,155,948  | 780,168   | 616,666   | 6,013,525  | 2,940,167                                                 | 4,992,615  | 58.9                                        |
| Subtotal <sup>‡</sup>        | 6,291,490                            | 4,086,626  | 3,412,485  | 2,434,404 | 2,120,108 | 18,345,113 | 8,995,198                                                 | 15,369,915 | 58.5                                        |
| <b>Northwest<sup>†</sup></b> | 4,138,090                            | 3,576,331  | 2,843,240  | 1,911,816 | 1,200,930 | 13,670,407 | /                                                         | /          | /                                           |
| Shaanxi                      | 1,741,193                            | 1,452,145  | 1,127,806  | 791,829   | 546,443   | 5,659,416  | 1,930,406                                                 | 4,796,819  | 40.2                                        |
| Gansu                        | 1,115,233                            | 988,253    | 783,252    | 555,025   | 281,301   | 3,723,064  | 1,005,469                                                 | 3,180,858  | 31.6                                        |
| Subtotal <sup>‡</sup>        | 2,856,426                            | 2,440,398  | 1,911,058  | 1,346,854 | 827,744   | 9,382,480  | 2,935,875                                                 | 7,977,677  | 36.8                                        |
| <b>Eastern<sup>†</sup></b>   | 20,841,073                           | 15,171,295 | 11,067,830 | 9,597,123 | 9,559,848 | 66,237,169 | /                                                         | /          | /                                           |
| Shanghai                     | 1,314,373                            | 822,634    | 540,230    | 672,949   | 715,392   | 4,065,578  | 3,037,617                                                 | 3,469,655  | 87.5                                        |
| Jiangsu                      | 4,509,526                            | 3,424,665  | 2,518,335  | 2,071,300 | 2,109,054 | 14,632,880 | 6,415,633                                                 | 12,574,637 | 51.0                                        |
| Zhejiang                     | 2,945,848                            | 1,888,489  | 1,392,201  | 1,399,713 | 1,391,743 | 9,017,994  | 3,615,547                                                 | 7,558,633  | 47.8                                        |
| Anhui                        | 3,092,465                            | 2,689,781  | 1,731,704  | 1,472,544 | 1,399,248 | 10,385,742 | 3,209,560                                                 | 8,931,533  | 35.9                                        |
| Fujian                       | 1,483,011                            | 1,174,122  | 985,834    | 782,993   | 843,944   | 5,269,904  | 1,976,740                                                 | 4,212,388  | 46.9                                        |
| Jiangxi                      | 2,034,514                            | 1,360,336  | 1,126,435  | 854,986   | 763,388   | 6,139,659  | 2,051,178                                                 | 5,099,258  | 40.2                                        |
| Shandong                     | 5,461,336                            | 3,811,268  | 2,773,091  | 2,342,638 | 2,337,079 | 16,725,412 | 5,890,238                                                 | 14,130,461 | 41.7                                        |

|                   |                   |                   |                   |                   |                   |                    |                   |                    |             |
|-------------------|-------------------|-------------------|-------------------|-------------------|-------------------|--------------------|-------------------|--------------------|-------------|
| Subtotal‡         | 20,841,073        | 15,171,295        | 11,067,830        | 9,597,123         | 9,559,848         | 66,237,169         | 26,196,513        | 55,976,565         | 46.8        |
| <b>Central†</b>   | <b>11,468,304</b> | <b>8,228,294</b>  | <b>5,837,144</b>  | <b>4,894,154</b>  | <b>4,282,840</b>  | <b>34,710,736</b>  | <b>10,919,892</b> | <b>29,498,021</b>  | <b>37.0</b> |
| Henan             | 4,710,130         | 3,382,826         | 2,206,422         | 1,892,366         | 1,752,700         | 13,944,444         | 3,949,435         | 11,968,210         | 33.0        |
| Hubei             | 3,152,382         | 2,366,137         | 1,533,074         | 1,375,022         | 1,064,841         | 9,491,456          | 3,440,366         | 7,973,958          | 43.1        |
| Hunan             | 3,605,792         | 2,479,331         | 2,097,648         | 1,626,766         | 1,465,299         | 11,274,836         | 3,530,091         | 9,555,853          | 36.9        |
| Subtotal‡         | 11,468,304        | 8,228,294         | 5,837,144         | 4,894,154         | 4,282,840         | 34,710,736         | 10,919,892        | 29,498,021         | 37.0        |
| <b>Southern†</b>  | <b>5,883,760</b>  | <b>4,401,043</b>  | <b>3,729,775</b>  | <b>3,083,410</b>  | <b>3,102,131</b>  | <b>20,200,119</b>  | <b>/</b>          | <b>/</b>           | <b>/</b>    |
| Guangdong         | 3,554,752         | 2,513,452         | 2,139,881         | 1,824,274         | 1,885,929         | 11,918,288         | 5,626,058         | 10,152,391         | 55.4        |
| Guangxi           | 1,991,489         | 1,670,878         | 1,360,867         | 1,069,113         | 1,020,148         | 7,112,495          | 2,026,426         | 6,036,234          | 33.6        |
| Subtotal‡         | 5,546,241         | 4,184,330         | 3,500,748         | 2,893,387         | 2,906,077         | 19,030,783         | 7,652,484         | 16,188,625         | 47.3        |
| <b>Southwest†</b> | <b>9,678,523</b>  | <b>8,450,148</b>  | <b>6,285,883</b>  | <b>4,250,756</b>  | <b>4,112,467</b>  | <b>32,777,777</b>  | <b>/</b>          | <b>/</b>           | <b>/</b>    |
| Chongqing         | 1,741,535         | 1,578,106         | 1,059,381         | 760,486           | 735,970           | 5,875,478          | 2,117,648         | 5,024,394          | 42.1        |
| Sichuan           | 4,538,640         | 3,995,193         | 2,868,499         | 1,858,501         | 1,928,087         | 15,188,920         | 4,367,383         | 13,109,909         | 33.3        |
| Guizhou           | 1,571,294         | 1,344,603         | 1,117,797         | 744,128           | 617,860           | 5,395,682          | 1,242,446         | 4,461,272          | 27.8        |
| Subtotal‡         | 7,851,469         | 6,917,902         | 5,045,677         | 3,363,115         | 3,281,917         | 26,460,080         | 7,727,477         | 22,595,575         | 34.2        |
| <b>Nation</b>     | <b>67,010,444</b> | <b>49,415,078</b> | <b>37,645,394</b> | <b>29,758,065</b> | <b>27,359,311</b> | <b>211,188,292</b> | <b>78,291,143</b> | <b>177,594,440</b> | <b>44.1</b> |

\* Including the population in city and township in the 2010 census.

† Total population for the region.

‡ Total population for the provinces of the region which are included in the study (Supplementary Materials 2, figure S1).

/ not used in the study.
