# Supplementary material for: Cost-effectiveness of introducing national seasonal influenza vaccination for adults aged 60 years and above in mainland China: a modelling analysis
Source: PubMed Central journal article supplement (PMC7155276; doi:10.1186/s12916-020-01545-6), 2020-04-14
Supplement: 12916_2020_1545_MOESM5_ESM.pdf [file 12916_2020_1545_MOESM5_ESM.pdf]

## Additional file 5. Influenza-related disease burden in older adults, China

Table S2. Influenza-like-illness (ILI) consultations due to influenza and influenza-related respiratory excess mortality for elderly aged 60 or above, stratified by provinces in China between 2010-2015 (mean, 95%CI)

| Region    | Province     | Influenza-associated ILI consultations<br>(per 100,000 population) <sup>28</sup> | Influenza-related respiratory excess mortality<br>(per 100,000 population) <sup>12</sup> |
|-----------|--------------|----------------------------------------------------------------------------------|------------------------------------------------------------------------------------------|
| Northern  | Beijing      | 470 (360, 580)                                                                   | 72.7 (64.6, 81.2)                                                                        |
|           | Tianjin      | 480 (320, 650)                                                                   | 18.8 (13.5, 23.5)                                                                        |
| Northeast | Liaoning     | 60 (40, 80)                                                                      | 23.0 (20.1, 27.2)                                                                        |
|           | Jilin        | 10 (-10, 30)                                                                     | 19.3 (16.3, 22.4)                                                                        |
|           | Heilongjiang | 60 (20, 100)                                                                     | 19.8 (16.5, 23.1)                                                                        |
| Northwest | Shaanxi      | 20 (-10, 50)                                                                     | 38.9 (34.0, 44.0)                                                                        |
|           | Gansu        | 20 (0, 30)                                                                       | 83.2 (70.8, 93.9)                                                                        |
| Eastern   | Shanghai     | 690 (530, 870)                                                                   | 37.8 (31.5, 43.9)                                                                        |
|           | Jiangsu      | 80 (40, 130)                                                                     | 48.0 (42.0, 54.2)                                                                        |
|           | Zhejiang     | 230 (170, 290)                                                                   | 57.3 (52.8, 61.7)                                                                        |
|           | Anhui        | 70 (40, 90)                                                                      | 29.9 (25.0, 34.0)                                                                        |
|           | Fujian       | 60 (30, 90)                                                                      | 63.1 (53.4, 72.2)                                                                        |
|           | Jiangxi      | 80 (60, 100)                                                                     | 12.5 (1.3, 24.8)                                                                         |
|           | Shandong     | 30 (10, 50)                                                                      | 41.0 (37.2, 46.5)                                                                        |
| Central   | Henan        | 20 (-10, 60)                                                                     | 19.0 (15.5, 22.6)                                                                        |
|           | Hubei        | 130 (70, 180)                                                                    | 20.2 (16.3, 23.9)                                                                        |
|           | Hunan        | 20 (10, 40)                                                                      | 42.0 (35.3, 50.7)                                                                        |
| Southern  | Guangdong    | 180 (110, 260)                                                                   | 34.9 (23.4, 48.5)                                                                        |
|           | Guangxi      | 40 (30, 60)                                                                      | 63.9 (48.8, 76.9)                                                                        |
| Southwest | Chongqing    | 10 (10, 20)                                                                      | 44.0 (36.4, 52.0)                                                                        |
|           | Sichuan      | 10 (0, 20)                                                                       | 27.3 (20.3, 38.0)                                                                        |
|           | Guizhou      | 10 (0, 30)                                                                       | 55.1 (41.6, 69.8)                                                                        |
| Nation    | Nation       | 90 (40, 150)                                                                     | 38.5 (36.8, 40.2)                                                                        |
