# Supplementary material for: Cost-effectiveness of introducing national seasonal influenza vaccination for adults aged 60 years and above in mainland China: a modelling analysis
Source: PubMed Central journal article supplement (PMC7155276; doi:10.1186/s12916-020-01545-6), 2020-04-14
Supplement: 12916_2020_1545_MOESM6_ESM.pdf [file 12916_2020_1545_MOESM6_ESM.pdf]

## **Additional file 6. Age-specific life expectancy in the older adults, China**

We figured out the risk- (HRs and LRs mentioned in Supplementary Materials 3) and age-specific life expectancy stratified by urban/rural areas by assuming that all mortality due to high risk diseases occurs in HRs, while mortality due to other causes (i.e., other than high risk diseases) occurs equally in HRs and LRs. Therefore, the mortality in LRs equals to all-cause mortality minus HRs disease related mortality. HRs population may die from HRs diseases or other causes. So,

$$\text{The mortality of HRs population} = \frac{\text{the number of HRs population death}}{\text{the number of HRs population}} = \frac{\text{the number of HRs population death}}{\text{total population size} \times \text{HRs proportion}} = \frac{\text{HRs disease related mortality}}{\text{HRs proportion}} + (\text{all cause mortality} - \text{HRs disease related mortality})$$

(8)

The age-specific mortality in 2017 was presented in table S3. The HRs proportion stratified by rural/urban areas was presented in Fig S3. The life expectancy in LRs is not affected by HRs proportion. The life table approach used in estimating the life expectancy on the basis of risk-specific mortality were described in “WHO methods for life expectancy and healthy life expectancy”.<sup>39</sup> (Table S4)

Table S3. Age-specific mortality stratified by rural/urban areas in the elderly in China  
in 2017 (1/100,000).<sup>31</sup>

|                                   | 60-     | 65-     | 70-     | 75-     | 80-     | ≥85      |
|-----------------------------------|---------|---------|---------|---------|---------|----------|
| Urban area                        |         |         |         |         |         |          |
| All diseases                      | 1020.81 | 1616.34 | 2223.63 | 3518.55 | 7601.16 | 19231.9  |
| High risk diseases*               |         |         |         |         |         |          |
| Chronic lower respiratory disease | 42.19   | 88.51   | 173.57  | 328.16  | 789.56  | 2116.37  |
| Diabetes                          | 31.28   | 54.95   | 79.58   | 120.52  | 247.87  | 448.59   |
| Hypertensive heart disease        | 13.49   | 27.2    | 45.33   | 86.71   | 238.79  | 772.67   |
| Coronary heart disease            | 136.3   | 235.43  | 359.55  | 662.37  | 1683.37 | 5103.43  |
| Congenital heart disease          | 0.35    | 0.27    | 0.33    | 0.31    | 0.39    | 0.74     |
| Chronic renal failure             | 4.18    | 6.57    | 8.67    | 11.52   | 22.07   | 47.68    |
| Hepatic disease                   | 15.31   | 18.81   | 17.41   | 22.28   | 38.59   | 67.26    |
| Stroke                            | 4.45    | 9.39    | 16.85   | 28.61   | 67.23   | 183.97   |
| Hematologic disease               | 1.48    | 3.22    | 3.93    | 6.14    | 14.64   | 33.11    |
| AIDS                              | 1.13    | 0.76    | 0.7     | 0.81    | 1.17    | 1.03     |
| Respiratory tract tuberculosis    | 3.41    | 4.56    | 5       | 6.99    | 12.68   | 20.75    |
| Total                             | 253.57  | 449.67  | 710.92  | 1274.42 | 3116.36 | 8795.60  |
| Rural area                        |         |         |         |         |         |          |
| All diseases                      | 1067.61 | 1749.23 | 2689.76 | 4120.11 | 7368.13 | 16683.92 |
| High risk diseases*               |         |         |         |         |         |          |
| Chronic lower respiratory disease | 51.82   | 115.13  | 257.07  | 496.87  | 1039.72 | 2493.81  |
| Diabetes                          | 26.26   | 49.32   | 74.69   | 100.09  | 141.99  | 205.13   |
| Hypertensive heart disease        | 15.11   | 32.65   | 67.16   | 128.55  | 302.88  | 820.61   |
| Coronary heart disease            | 148.66  | 264.28  | 450.14  | 768.43  | 1588.43 | 4247.27  |
| Congenital heart disease          | 0.18    | 0.14    | 0.11    | 0.09    | 0.07    | 0.55     |
| Chronic renal failure             | 3.36    | 4.83    | 6.62    | 9.31    | 13.12   | 23.38    |
| Hepatic disease                   | 13.85   | 16.86   | 19.31   | 22.63   | 25.75   | 34.62    |
| Stroke                            | 5.93    | 11.88   | 23.7    | 45.62   | 91.5    | 231.98   |
| Hematologic disease               | 1.77    | 2.74    | 4.18    | 5.57    | 10.53   | 23.59    |
| AIDS                              | 0.84    | 1.05    | 0.66    | 0.78    | 0.6     | 0.49     |
| Respiratory tract tuberculosis    | 4.32    | 6.97    | 9.1     | 12.51   | 14.43   | 16.44    |
| Total                             | 272.10  | 505.85  | 912.74  | 1590.45 | 3229.02 | 8097.87  |

\*High risk disease refers to those could increase risk of hospitalization or death if infected by influenza as listed in the WHO guidelines.

Table S4. Average age-specific life expectancy in the elderly in China

| Region    | Area  | 60-   |       | 65-   |       | 70-   |       | 75-  |      | ≥80  |      |
|-----------|-------|-------|-------|-------|-------|-------|-------|------|------|------|------|
|           |       | HRs   | LRs   | HRs   | LRs   | HRs   | LRs   | HRs  | LRs  | HRs  | LRs  |
| Northern  | Urban | 19.18 | 21.32 | 15.19 | 17.06 | 11.46 | 12.93 | 7.75 | 8.75 | 4.03 | 4.50 |
|           | Rural | 17.81 | 21.07 | 13.95 | 16.82 | 10.43 | 12.74 | 7.15 | 8.69 | 3.87 | 4.53 |
| Northeast | Urban | 19.04 | 21.32 | 15.08 | 17.06 | 11.37 | 12.93 | 7.69 | 8.75 | 4.00 | 4.50 |
|           | Rural | 18.25 | 21.07 | 14.33 | 16.82 | 10.74 | 12.74 | 7.36 | 8.69 | 3.96 | 4.53 |
| Northwest | Urban | 18.94 | 21.32 | 14.99 | 17.06 | 11.30 | 12.93 | 7.64 | 8.75 | 3.98 | 4.50 |
|           | Rural | 17.53 | 21.07 | 13.71 | 16.82 | 10.23 | 12.74 | 7.01 | 8.69 | 3.81 | 4.53 |
| Eastern   | Urban | 18.44 | 21.32 | 14.55 | 17.06 | 10.96 | 12.93 | 7.41 | 8.75 | 3.87 | 4.50 |
|           | Rural | 17.18 | 21.07 | 13.39 | 16.82 | 9.98  | 12.74 | 6.84 | 8.69 | 3.73 | 4.53 |
| Central   | Urban | 18.44 | 21.32 | 14.55 | 17.06 | 10.96 | 12.93 | 7.41 | 8.75 | 3.87 | 4.50 |
|           | Rural | 17.18 | 21.07 | 13.39 | 16.82 | 9.98  | 12.74 | 6.84 | 8.69 | 3.73 | 4.53 |
| Southern  | Urban | 16.18 | 21.32 | 12.60 | 17.06 | 9.42  | 12.93 | 6.35 | 8.75 | 3.37 | 4.50 |
|           | Rural | 17.43 | 21.07 | 13.61 | 16.82 | 10.15 | 12.74 | 6.96 | 8.69 | 3.79 | 4.53 |
| Southwest | Urban | 18.17 | 21.32 | 14.32 | 17.06 | 10.78 | 12.93 | 7.28 | 8.75 | 3.81 | 4.50 |
|           | Rural | 17.12 | 21.07 | 13.34 | 16.82 | 9.94  | 12.74 | 6.81 | 8.69 | 3.72 | 4.53 |
