# Supplementary material for: Cost-effectiveness of introducing national seasonal influenza vaccination for adults aged 60 years and above in mainland China: a modelling analysis
Source: PubMed Central journal article supplement (PMC7155276; doi:10.1186/s12916-020-01545-6), 2020-04-14
Supplement: 12916_2020_1545_MOESM10_ESM.pdf [file 12916_2020_1545_MOESM10_ESM.pdf]

**Additional file 10. Additional results for analyses with a discount rate of zero for QALYs loss**

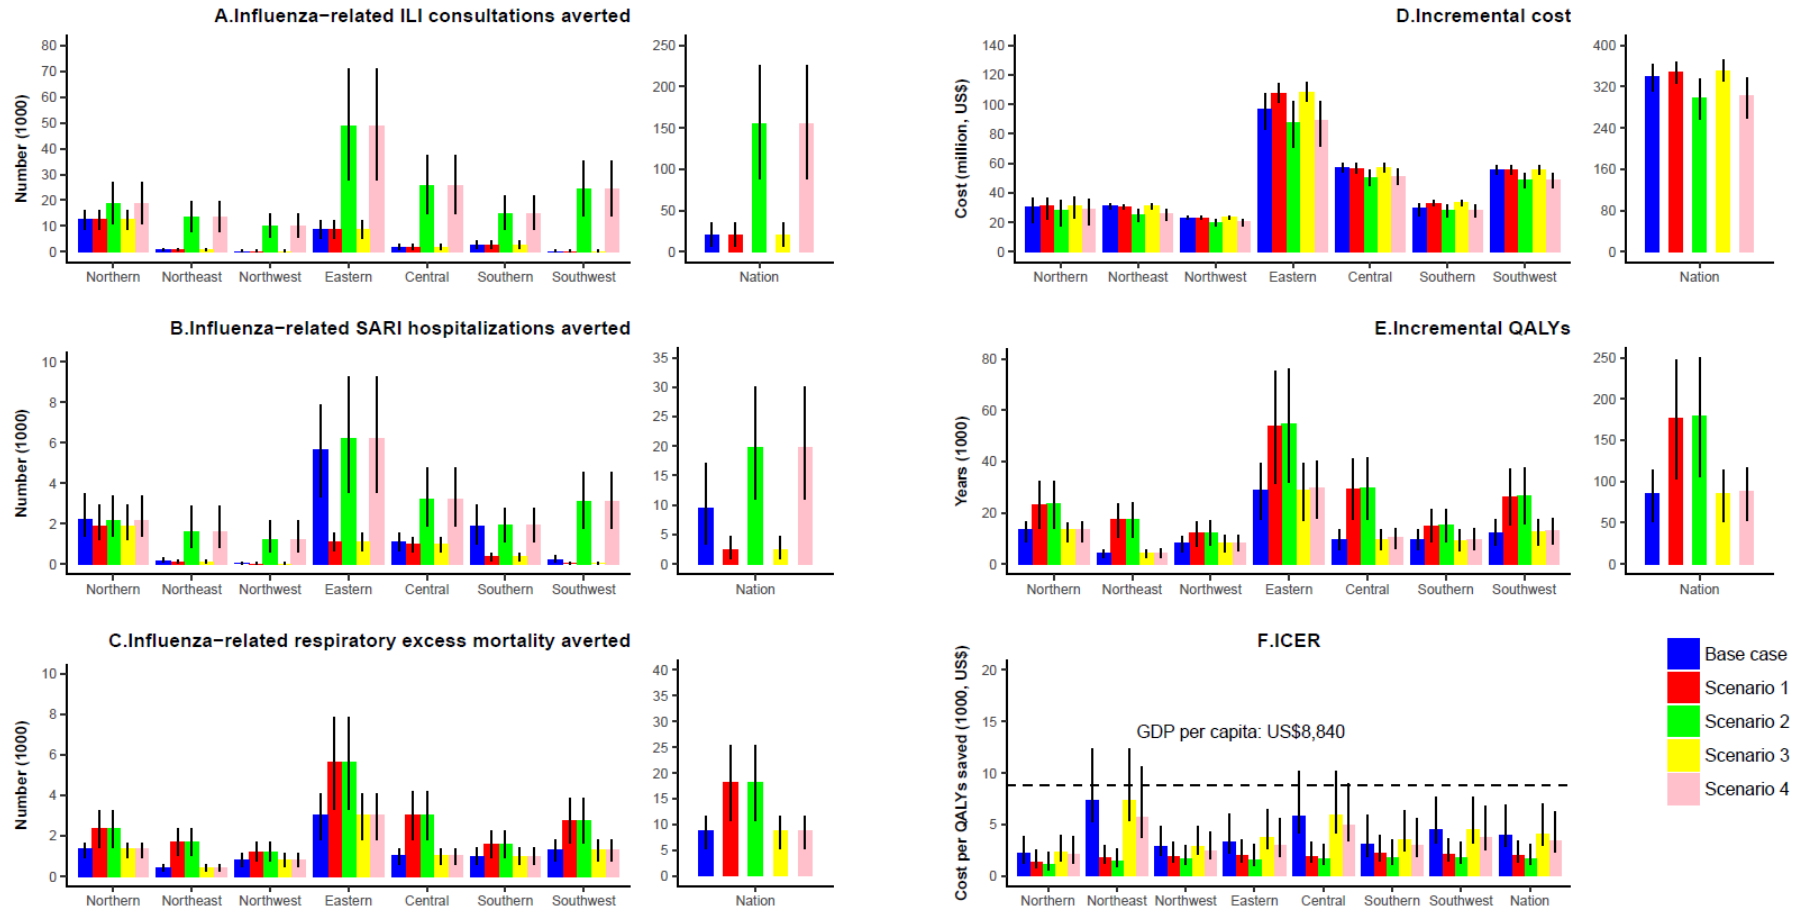

Figure S12. Analyses with a discount rate of zero for QALYs loss: Epidemiological and economic impact of fully-funded influenza vaccination program in older adults, stratified by geographic regions, China

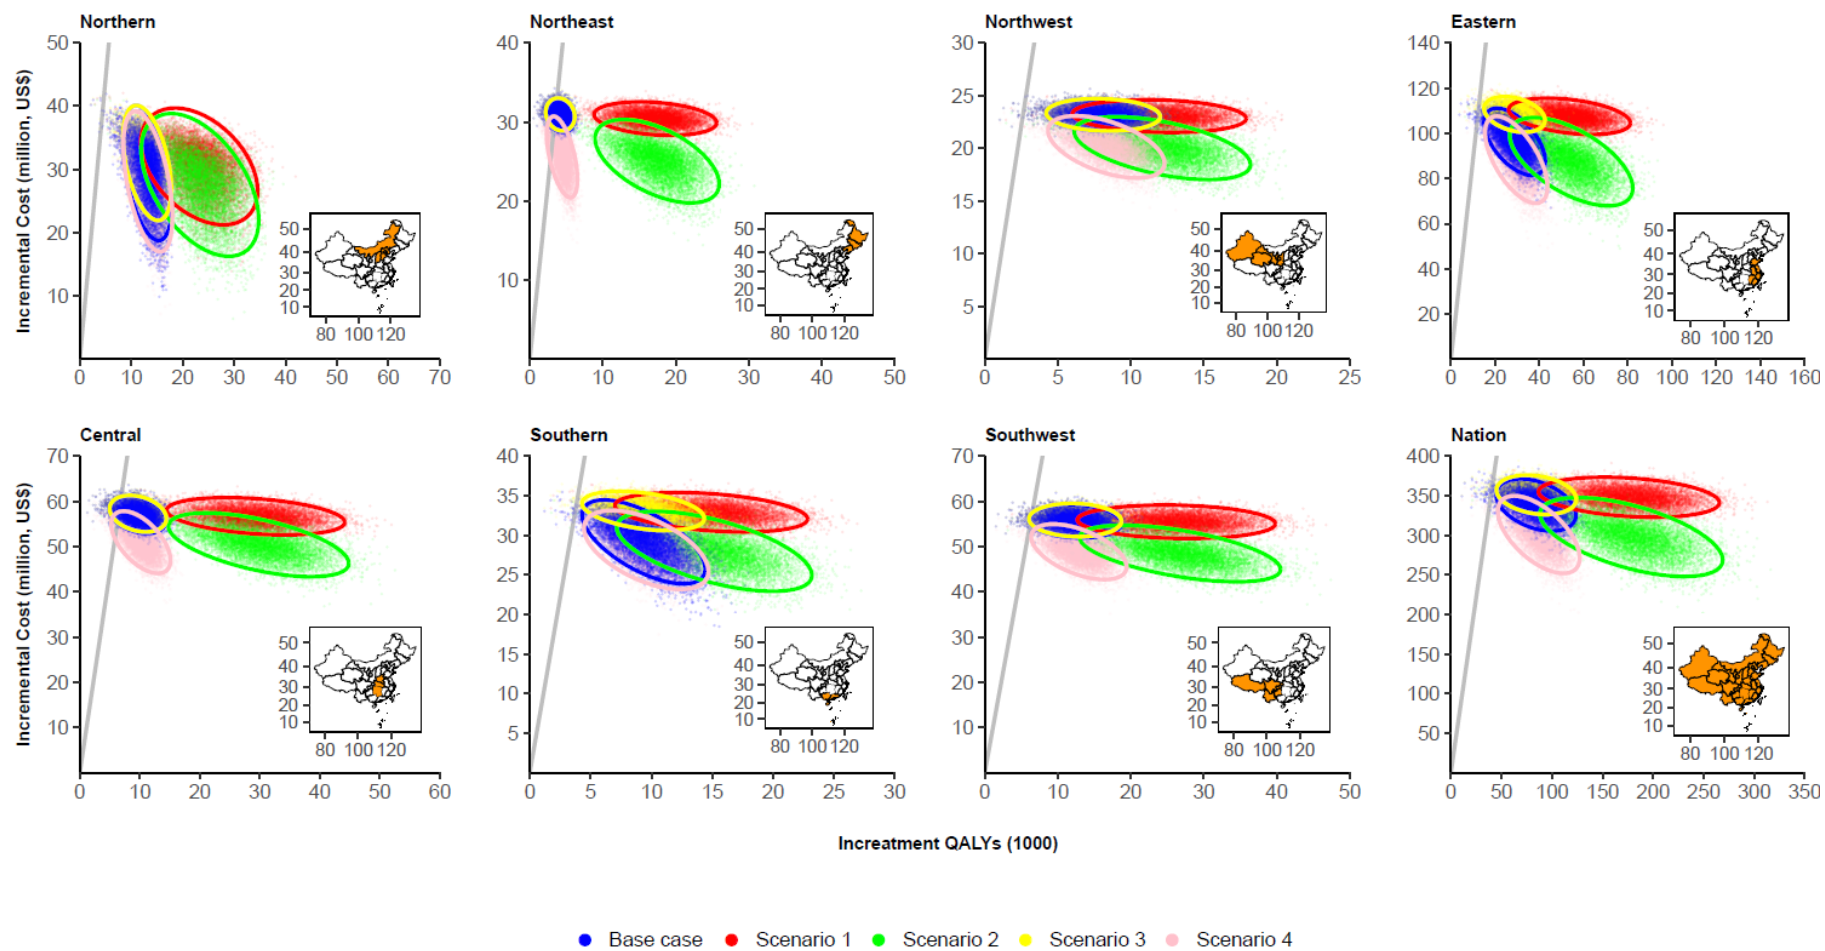

Figure S13. Analyses with a discount rate of zero for QALYs loss: Monte Carlo simulation results on the cost-effectiveness for fully-funded vaccination program compared to self-paid vaccination program (grey line denotes China's GDP per capita in 2017 and circle denotes the 95%UI)

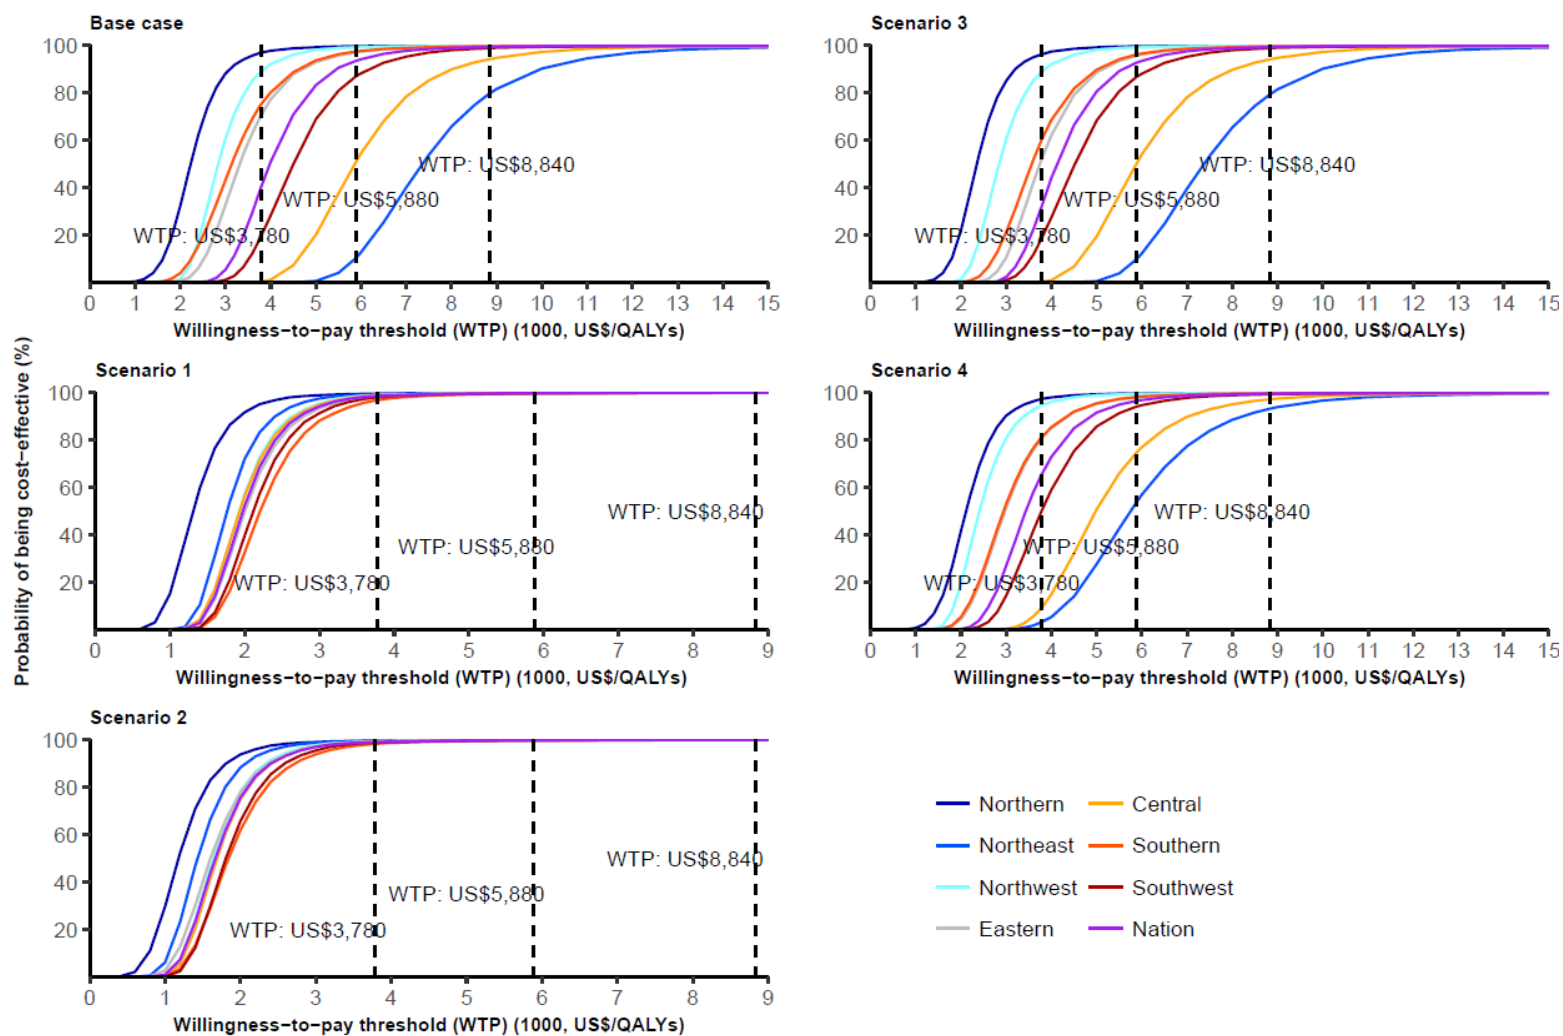

Figure S14. Analyses with a discount rate of zero for QALYs loss: Cost-effectiveness acceptability curve (US\$3,780 and US\$5,880 denote the willingness-to-pay thresholds calculated<sup>47</sup>, while US\$8,840 is the GDP per capita in 2017, China)
