# Supplementary material for: Cost-effectiveness of introducing national seasonal influenza vaccination for adults aged 60 years and above in mainland China: a modelling analysis
Source: PubMed Central journal article supplement (PMC7155276; doi:10.1186/s12916-020-01545-6), 2020-04-14
Supplement: 12916_2020_1545_MOESM11_ESM.pdf [file 12916_2020_1545_MOESM11_ESM.pdf]

### Additional file 11. Additional results: Analyses with the vaccine effectiveness between 2013-2018 in the US

Table S5. Comparison of the national epidemiological and economic impact of fully-funded influenza vaccination in baseline analysis using the meta-synthesized vaccine effectiveness<sup>44</sup> with sensitivity analysis using the US vaccine effectiveness<sup>\*49</sup> (Median, 95%UI)

|                                                        | Baseline analysis (vaccine effectiveness=36%) |                            |                            |                          |                            | Sensitivity analysis (vaccine effectiveness=12%) |                          |                          |                          |                          | Sensitivity analysis (vaccine effectiveness=50%) |                             |                             |                           |                             |
|--------------------------------------------------------|-----------------------------------------------|----------------------------|----------------------------|--------------------------|----------------------------|--------------------------------------------------|--------------------------|--------------------------|--------------------------|--------------------------|--------------------------------------------------|-----------------------------|-----------------------------|---------------------------|-----------------------------|
|                                                        | Base case scenario                            | Scenario 1                 | Scenario 2                 | Scenario 3               | Scenario 4                 | Base case scenario                               | Scenario 1               | Scenario 2               | Scenario 3               | Scenario 4               | Base case scenario                               | Scenario 1                  | Scenario 2                  | Scenario 3                | Scenario 4                  |
| Influenza-related consultations averted                | 19,812<br>(7150, 35783)                       | 19,812<br>(7150, 35783)    | 155,554<br>(88896, 226519) | 19,812<br>(7150, 35783)  | 155,554<br>(88896, 226519) | 6,822<br>(2667, 10993)                           | 6,822<br>(2667, 10993)   | 52,535<br>(39625, 65726) | 6,822<br>(2667, 10993)   | 52,535<br>(39625, 65726) | 28,426<br>(11112, 45805)                         | 28,426<br>(11112, 45805)    | 218,896<br>(165105, 273859) | 28,426<br>(11112, 45805)  | 218,896<br>(165105, 273859) |
| Influenza-related SARI averted                         | 9,418<br>(3386, 17068)                        | 2,509<br>(898, 4701)       | 19,695<br>(10999, 30122)   | 2,509<br>(898, 4701)     | 19,695<br>(10999, 30122)   | 3,247<br>(1253, 5233)                            | 863<br>(329, 1448)       | 6,640<br>(4790, 8856)    | 863<br>(329, 1448)       | 6,640<br>(4790, 8856)    | 13,529<br>(5219, 21806)                          | 3,598<br>(1373, 6034)       | 27,667<br>(19958, 36899)    | 3,598<br>(1373, 6034)     | 27,667<br>(19958, 36899)    |
| Influenza-related respiratory excess mortality averted | 8,800<br>(5300, 11667)                        | 18,279<br>(10782, 25433)   | 18,279<br>(10782, 25433)   | 8,800<br>(5300, 11667)   | 8,800<br>(5300, 11667)     | 2,928<br>(2836, 3020)                            | 6,115<br>(5304, 7087)    | 6,115<br>(5304, 7087)    | 2,928<br>(2836, 3020)    | 2,928<br>(2836, 3020)    | 12,201<br>(11816, 12583)                         | 25,477<br>(22101, 29528)    | 25,477<br>(22101, 29528)    | 12,201<br>(11816, 12583)  | 12,201<br>(11816, 12583)    |
| Incremental cost (millions, US\$)                      | 339<br>(310, 363)                             | 348<br>(328, 369)          | 299<br>(256, 335)          | 351<br>(331, 371)        | 302<br>(259, 338)          | 355<br>(336, 374)                                | 358<br>(339, 377)        | 341<br>(321, 362)        | 359<br>(340, 378)        | 342<br>(322, 363)        | 329<br>(297, 356)                                | 342<br>(322, 362)           | 273<br>(227, 309)           | 346<br>(326, 367)         | 277<br>(231, 313)           |
| Incremental QALYs                                      | 70,212<br>(42106, 93635)                      | 145,356<br>(85419, 203317) | 147,745<br>(87285, 206175) | 70,505<br>(42226, 93912) | 72,830<br>(43621, 97089)   | 23,362<br>(22512, 24228)                         | 48,626<br>(42176, 56301) | 49,429<br>(42960, 57079) | 23,463<br>(22657, 24285) | 24,253<br>(23295, 25311) | 97,341<br>(93798, 100951)                        | 202,609<br>(175733, 234587) | 205,956<br>(179000, 237830) | 97,762<br>(94404, 101188) | 101,053<br>(97062, 105463)  |
| ICER                                                   | 4,832<br>(3460, 8307)                         | 2,393<br>(1681, 4146)      | 2,008<br>(1313, 3722)      | 4,986<br>(3657, 8451)    | 4,134<br>(2797, 7534)      | 15,190<br>(14140, 16296)                         | 7,362<br>(6307, 8583)    | 6,907<br>(5896, 8067)    | 15,303<br>(14343, 16327) | 14,114<br>(13073, 15157) | 3,381<br>(2976, 3747)                            | 1,688<br>(1438, 1979)       | 1,320<br>(1045, 1611)       | 3,543<br>(3287, 3816)     | 2,744<br>(2258, 3138)       |

\*In the baseline analysis, an average vaccine effectiveness of 36% was obtained from a published meta-analysis of test-negative design case-control studies which were conducted between 2004 and 2013<sup>44</sup>. In the sensitivity analysis, the most recent vaccine effectiveness between 2013-2018 in the US (range: 12%-50%)<sup>49</sup> were used, with the vaccine effectiveness of 12% and 50% separately for mismatched and well-matched vaccines.
